# Supplementary material for: Preparation of Mesoporous Si Nanoparticles by Magnesiothermic Reduction for the Enhanced Reactivity
Source: MDPI journal article supplement (doi:10.3390/molecules28073274), 2023-04-06
Supplement: s1 [file s1]

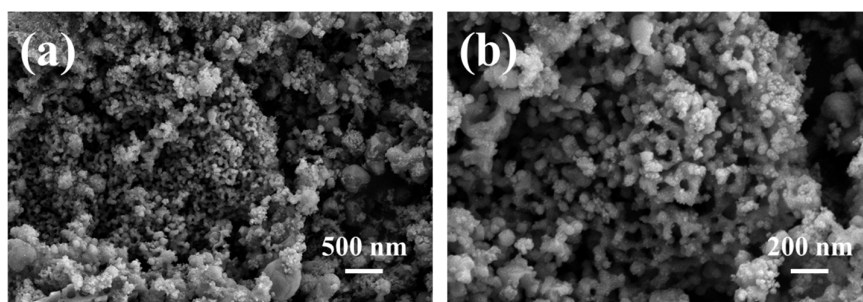

**Figure S1.** SEM images of M-Si obtained through a magnesiothermic reduction process without the use of a heat absorber.

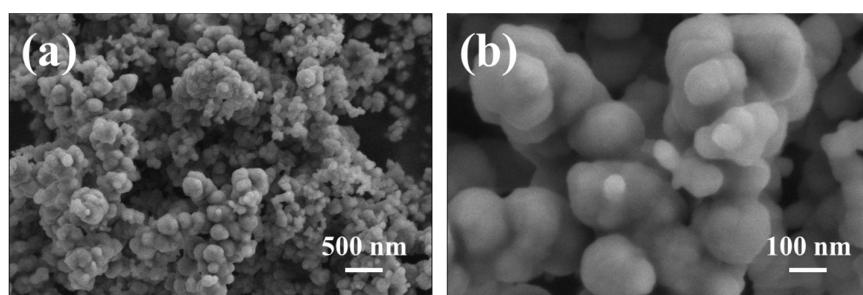

**Figure S2.** SEM images of commercially available non-porous silicon nanopowders.

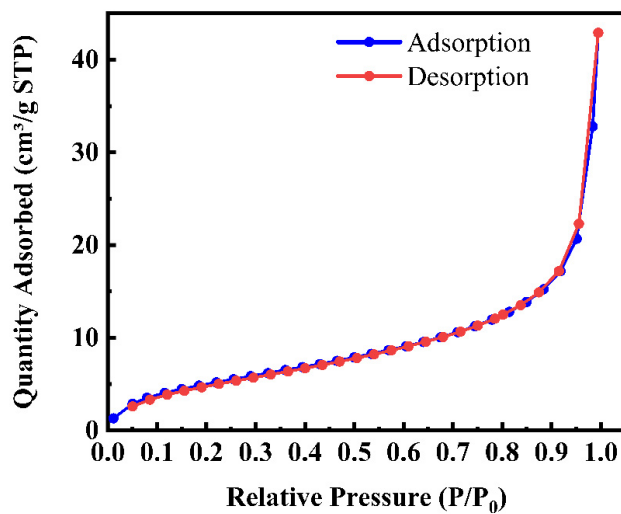

**Figure S3.** The  $\text{N}_2$  adsorption/desorption isotherm of commercially available non-porous silicon nanopowders.
